# Supplementary material
Source: PubMed Central journal article supplement (PMC4269470)
Supplement: NIHMS648791-supplement-SupFig_1-5.pdf [file NIHMS648791-supplement-SupFig_1-5.pdf]

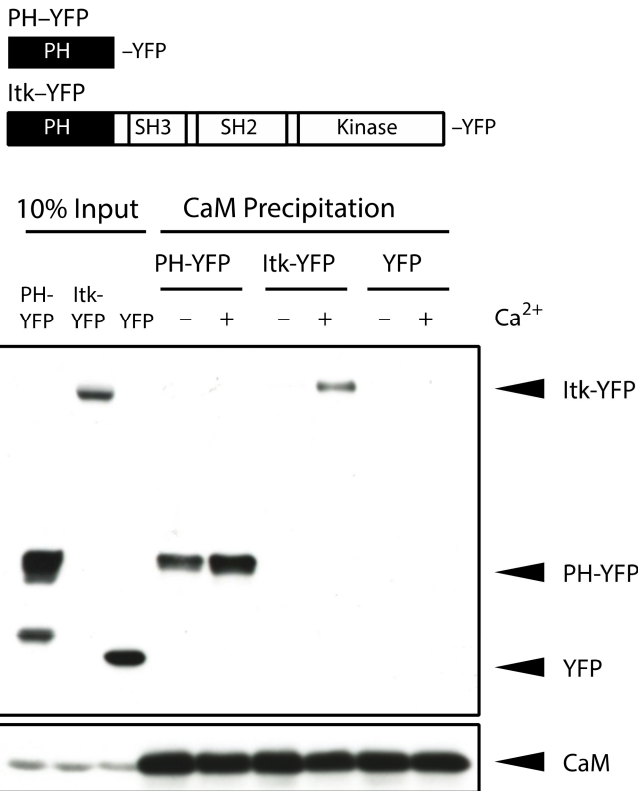

**Fig. S1. CaM binding maps to the Itk PH domain.** Full-length Itk and the Itk PH domain were tagged with YFP and expressed in 293 epithelial cells. CaM association was assessed by coprecipitation with CaM-coated beads in the presence or absence of 1  $\mu$ M Ca<sup>2+</sup>. Interacting proteins were detected by Western blot using antibodies recognizing GFP and YFP (JL-8). Data are representative of 3 experiments.

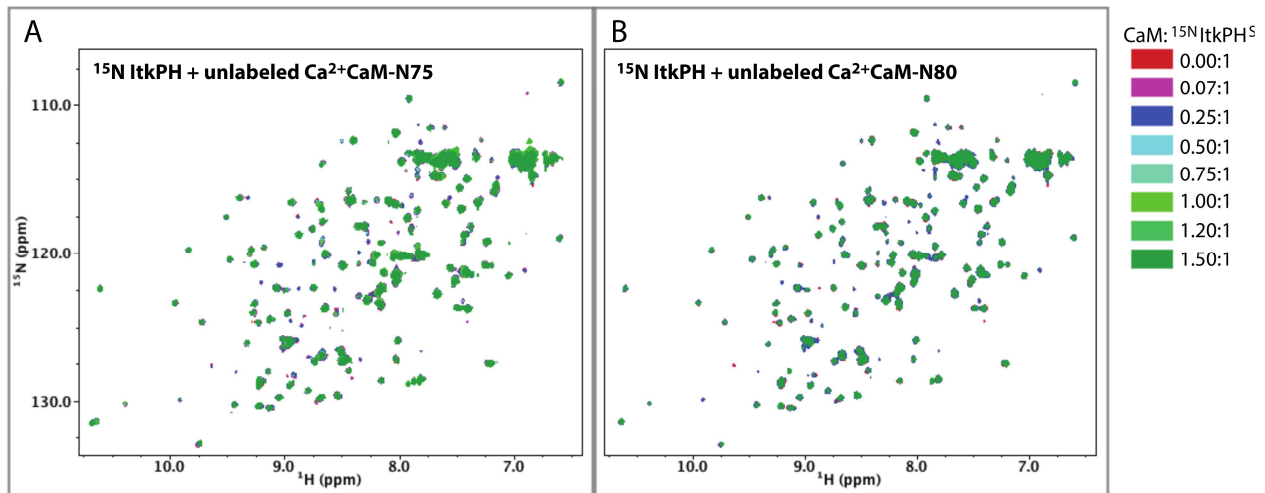

**Fig. S2. The N-domain of CaM does not bind to the Itk PH domain.** <sup>1</sup>H-<sup>15</sup>N HSQC NMR titrations of <sup>15</sup>N-Itk PH were performed with two different constructs of the N-terminal subdomain of CaM: **(A)** Ca<sup>2+</sup>/CaM-N75 (amino acids 1-75), **(B)** Ca<sup>2+</sup>/CaM-N80 (amino acids 1-80); CaM-N preps were first saturated with Ca<sup>2+</sup> and then dialyzed into NMR buffer with 1 mM CaCl<sub>2</sub>, as described in the main text Materials and Methods.

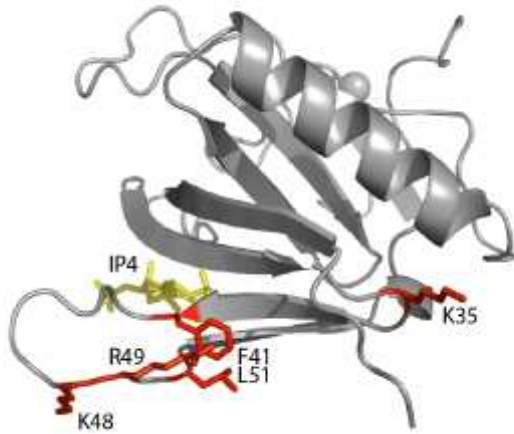

**Fig. S3. Structural model of the Itk PH domain showing the location of the mutated residues tested.** See table S1 for a list of the mutations. IP<sub>4</sub> is yellow; the indicated residues are labeled in red.

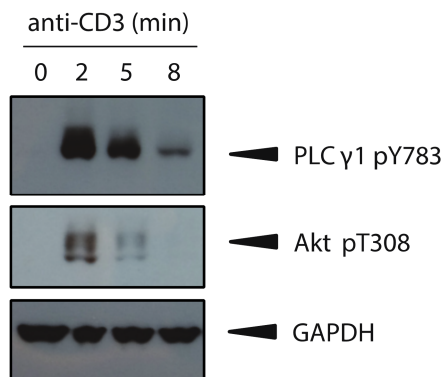

**Fig. S4. TCR stimulation promotes Akt activation and PLCγ1 phosphorylation in Jurkat E6.1 cells.** Jurkat E6.1 cells were rested overnight and stimulated with an antibody against CD3 (anti-CD3) for the indicated times. TCR-mediated activation of Akt (detected with antibodies recognizing the Thr<sup>308</sup>-phosphorylated form) and PLCγ1 (detected with antibodies recognizing the Tyr783-phosphorylated form) were assessed by Western blot. Data are representative of 2 experiments.

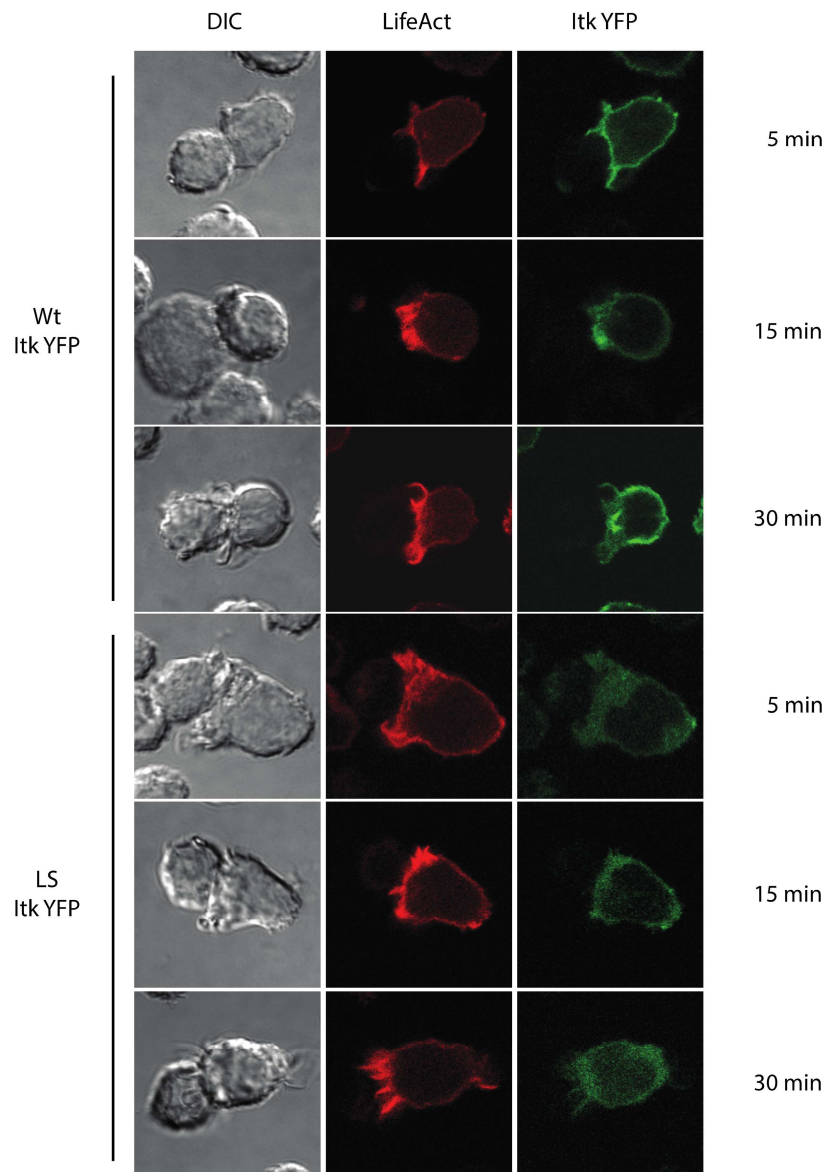

**Fig. S5. Kinetic analysis of recruitment of wild-type Itk or LS-Itk to the immune synapse.** Jurkat cells expressing WT-Itk-YFP or LS-Itk-YFP were transfected with pRuby-LifeAct. Jurkat-Daudi conjugates were made as previously described {Lin, 2003 #377}. Conjugates were fixed at the indicated times after copelleting and visualized by confocal microscopy. For each time point, colocalization of LifeAct-Ruby (red) and WT-Itk-YFP or LS-Itk-YFP fusion proteins (green) was assessed for 40 randomly selected cells (20 each for WT-Itk-YFP or LS-Itk-YFP). At least 80 cells were analyzed per time point in 2 independent experiments.
